# Supplementary material
Source: Elsevier journal article supplement (https://www.sciencedirect.com/science/article/pii/S0021755719302487)
Supplement: mmc1 [file S0021755719302487:mmc1.docx]

**JPED_2019-207_Supplementary Material**

**SUPPLEMENTARY MATERIAL**

**Table S1 - Articles per databases and terms used in the search.**

| **Databases** | **Number of articles found** | **Terms used in the search** |
| --- | --- | --- |
| PubMed | 453 | [(Anticonvulsive Agents) OR (Agents, Anticonvulsive) OR (Anticonvulsive Drugs) OR (Drugs, Anticonvulsive) OR (Anticonvulsant Drugs) OR (Drugs, Anticonvulsant) OR (Antiepileptic Agents) OR (Agents, Antiepileptic) OR (Antiepileptics) OR (Antiepileptic Drugs) OR (Drugs, Antiepileptic)] AND [(vitamin D) OR (bone metabolism) OR (25-OH vitamin D)]  Filter used for age 0-18 years. |
| Embase | 258 |
| Cochrane Library | 35 |
| LILACS | 2 |
